# Supplementary material for: Hepatic leukocyte immunoglobulin‐like receptor B4 (LILRB4) attenuates nonalcoholic fatty liver disease via SHP1‐TRAF6 pathway
Source: PubMed Central journal article supplement — Hepatology. 2018 Feb 7;67(4):1303–19. doi: 10.1002/hep.29633 (PMC5900726; doi:10.1002/hep.29633), 2018-02-07
Supplement: HEP-67-1303-s001.pdf [file HEP-67-1303-s001.pdf]

**Supplementary Fig. 1 Identification of LILRB4-HKO mice.** (A) Co-staining of LILRB4 and HNF4 in NC and HFD mice liver slice (n = 5 mice for each group) (B) Schematic representation of the targeting strategy to generate LILRB4 conditional KO allele. (C) Representative PCR analysis of *in vitro* Cre/loxP-mediated recombination of LILRB4 conditional allele.

**Supplementary Fig. 2 Hepatocyte LILRB4 overexpression ameliorates glucose and lipid metabolic disorder.** (A) The expression of LILRB4 in the liver, heart, brain, and kidney of LILRB4-NTG and LILRB4-HTG mice (n = 4 mice in each group). (B) Representative images of PAS-stained liver sections of LILRB4-NTG and LILRB4-HTG mice after 12 weeks of HFD treatment (n = 4 for each group). Scale bar, 100  $\mu$ m. (C, D) The mRNA (C; n = 4 for each group) and protein (D; n = 6 for each group) expression levels of PEPCK and G6Pase in the livers of mice in the NTG and HTG groups. (E) The mRNA expression levels of lipid metabolism-related genes in the livers of LILRB4-NTG and LILRB4-HTG mice after 12 weeks of HFD feeding (n = 4 for each group). #*P* < 0.05 versus NTG/HFD group.

**Supplementary Fig. 3 Hepatocyte LILRB4 regulates the recruitment of inflammatory cells**  
The representative images for F4/80 and MPO-positive cells in the liver sections of mice in LILRB4-Flox, LILRB4-HKO, NTG and LILRB4-HTG groups after 12 weeks of HFD treatment (n = 4 for each group). Scale bar, 20  $\mu$ m.



# Supplementary Figure 2

**A**

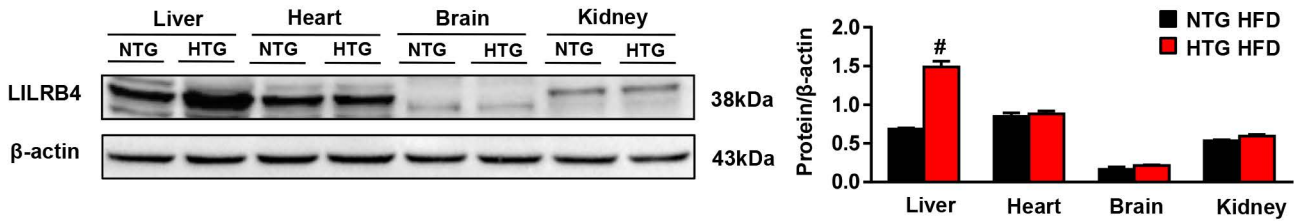

**B**

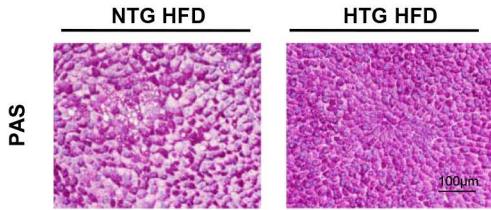

**C**

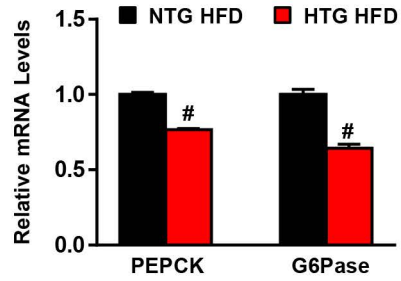

**D**

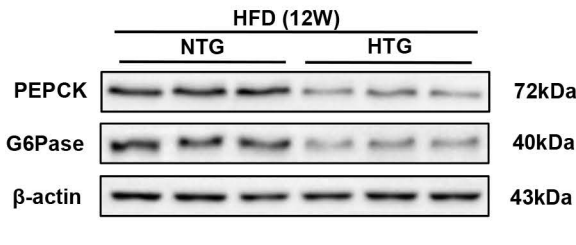

**E**

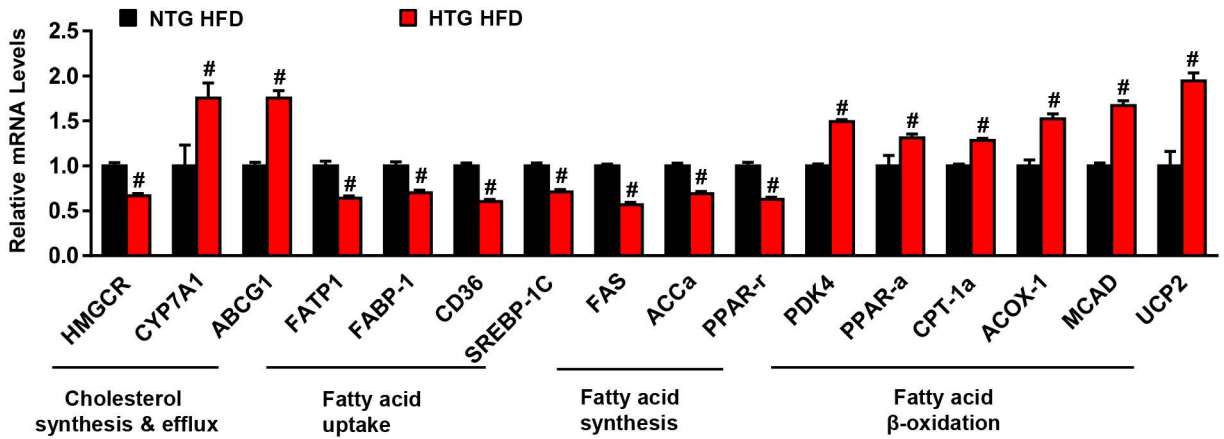

# Supplementary Figure 3

## A

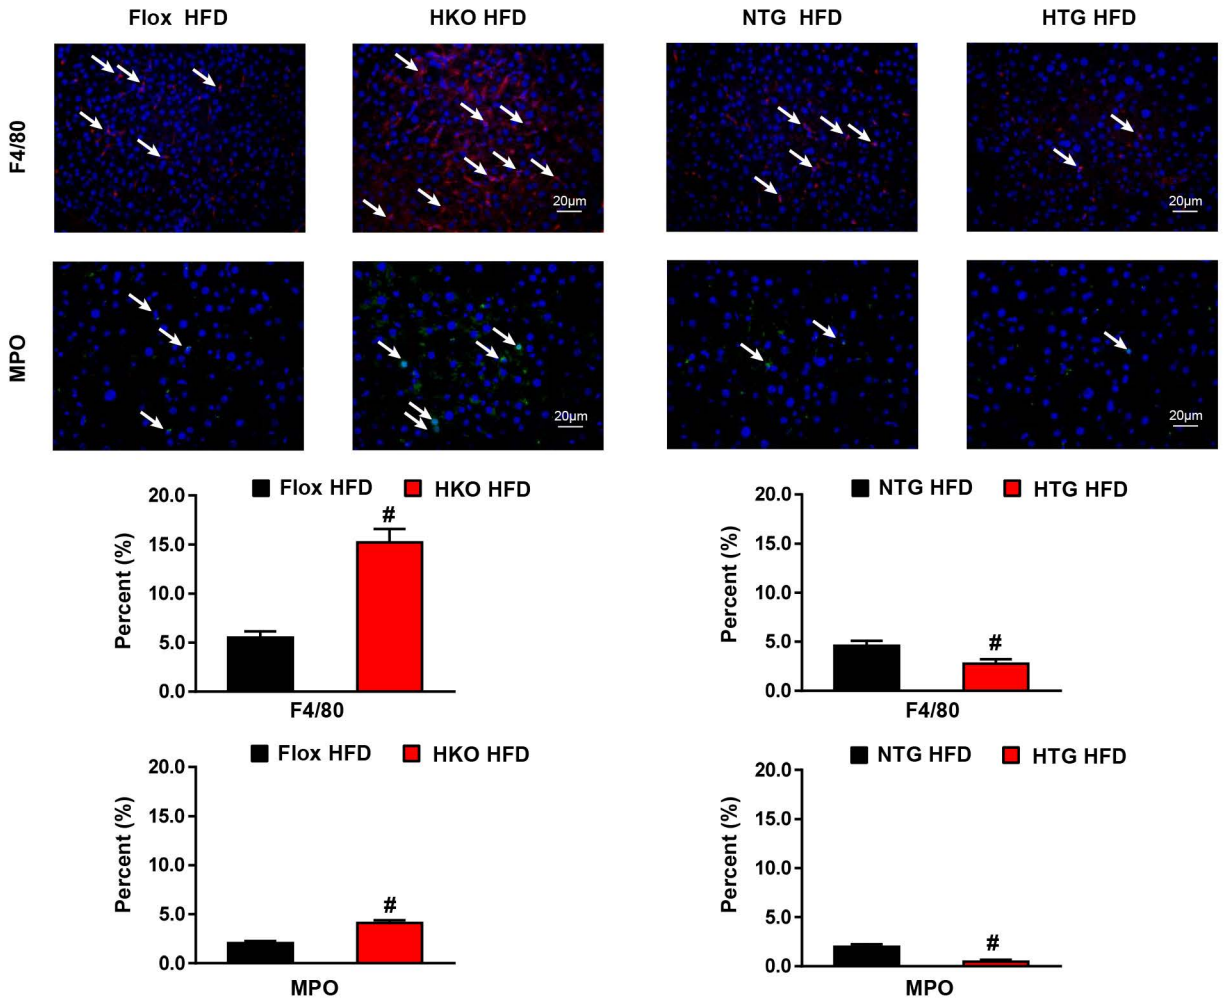

**Supplementary Table 1. Primers for Real-time PCR detection.**

| <b>Gene</b>    |         | <b>Sequence5'---3'(mouse)</b> |
|----------------|---------|-------------------------------|
| $\beta$ -actin | Forward | AGATCATTGCTCCTCCTGAGCGCA      |
|                | Reverse | AAACGCAGCTCAGTAACAGTCCGC      |
| PEPCK          | Forward | TGCCCCAGGCAGTGAGGAAGTT        |
|                | Reverse | GTCAGTGAGAGCCAGCCAACAGT       |
| G6Pase         | Forward | CGACTCGCTATCTCCAAGTGA         |
|                | Reverse | GGGCGTTGTCCAAACAGAAT          |
| HMGCR          | forward | ATCATGTGCTGCTTCGGCTGCAT       |
|                | reverse | AAATTGGACGACCCTCACGGCT        |
| CYP7A1         | forward | TCAAAGAGCGCTGTCTGGGTCA        |
|                | reverse | TTTCCCGGGCTTTATGTGCGGT        |
| ABCG1          | forward | TGAACCCGTTTCTTTGGCACCG        |
|                | reverse | AGTCCCGCATGATGCTGAGGAA        |
| FATP1          | forward | TGCACAGCAGGTACTACCGCAT        |
|                | reverse | TGCGCAGTACCACCGTCAAC          |
| FABP-1         | forward | TGGTCCGCAATGAGTTCACCCT        |
|                | reverse | CCAGCTTGACGACTGCCTTGACTT      |
| CD36           | forward | TGGGTTTTGCACATCAAAGA          |
|                | reverse | GATGGACCTGCAAATGTCAGA         |
| SREBP-1c       | forward | CACTTCTGGAGACATCGCAAAC        |
|                | reverse | ATGGTAGACAACAGCCGCATC         |
| FAS            | forward | CTGCGGAAACTTCAGGAAATG         |
|                | reverse | GGTTCGGAATGCTATCCAGG          |
| ACC $\alpha$   | forward | GGCCAGTGCTATGCTGAGAT          |
|                | reverse | AGGGTCAAGTGCTGCTCCA           |
| PPAR $\gamma$  | forward | ATTCTGGCCCACCAACTTCGG         |
|                | reverse | TGGAAGCCTGATGCTTTATCCCCA      |
| PDK4           | forward | TTCACACCTTCACCACATGC          |
|                | reverse | AAAGGGCGGTTTTCTTGATG          |
| PPAR- $\alpha$ | forward | TATTCGGCTGAAGCTGGTGTAC        |
|                | reverse | CTGGCATTGTTCCGGTTCT           |
| CPT-1 $\alpha$ | forward | AGGACCCTGAGGCATCTATT          |
|                | reverse | ATGACCTCCTGGCATTCTCC          |
| ACOX-1         | forward | CGGAAGATACATAAAGGAGACC        |
|                | reverse | AAGTAGGACACCATAACCACCC        |
| MCAD           | forward | TGGCGTATGGGTGTACAGGG          |
|                | reverse | CCAAATACTTCTTTTTTTGTTGATCA    |

|               |         |                            |
|---------------|---------|----------------------------|
| UCP2          | forward | GCTGGTGGTGGTCGGAGATA       |
|               | reverse | ACTGGCCCAAGGCAGAGTT        |
| IL -1 $\beta$ | forward | CCGTGGACCTTCCAGGATGA       |
|               | reverse | GGGAACGTCACACACCAGCA       |
| IL-6          | forward | AGTTGCCTTCTTGGGACTGA       |
|               | reverse | TCCACGATTTCCCAGAGAAC       |
| TNF- $\alpha$ | forward | CATCTTCTCAA AATTCGAGTGACAA |
|               | reverse | TGGGAGTAGACAAGGTACAACCC    |
| MCP1          | forward | TAAAAACCTGGATCGGAACCAA     |
|               | reverse | GCATTAGCTTCAGATTTACGGGT    |
| IL-10         | forward | CCAAGCCTTATCGGAAATGA       |
|               | reverse | TTTTCACAGGGGAGAAATCG       |
| CCL2          | forward | TACAAGAGGATCACCAGCAGC      |
|               | reverse | ACCTTAGGGCAGATGCAGTT       |
| CCL5          | forward | TGCTGCTTTGCCTACCTCTC       |
|               | reverse | TCTTCTCTGGGTTGGCACAC       |
| CXCL10        | forward | ATGACGGGCCAGTGAGAATG       |
|               | reverse | ATGATCTCAACACGTGGGCA       |
| IL-8          | forward | AGATGGAGGGCAAACCAACTT      |
|               | reverse | TTACCCCGCTGATGTGTGAG       |
| LCAD          | forward | GGAGTAAGAACGAACGCCAA       |
|               | reverse | GCCACGACGATCACGAGAT        |

---

**Supplementary Table 2. Antibodies for immunoblot analyses.**

| <b>Antibody</b>          | <b>Cat No.</b> | <b>Manufacturer</b> | <b>Sources of species</b> |
|--------------------------|----------------|---------------------|---------------------------|
| LILRB4                   | S3726-2        | Proteintech         | Rabbit                    |
| p-IRS1 <sup>Tyr608</sup> | 09-432         | Millipore           | Rabbit                    |
| IRS1                     | 2382           | CST                 | Rabbit                    |
| p-Akt <sup>Ser473</sup>  | 4060           | CST                 | Rabbit                    |
| Akt                      | 4691           | CST                 | Rabbit                    |
| p-GSK3 $\beta$           | 9322           | CST                 | Rabbit                    |
| GSK3 $\beta$             | 9315           | CST                 | Rabbit                    |
| PEPCK                    | ab187145       | Abcam               | Rabbit                    |
| G6Pase                   | APP44223-P050  | AVIVA System        | Rabbit                    |
| p-IKK $\beta$            | ab59195        | Abcam               | Rabbit                    |
| T-IKK $\beta$            | 8943           | CST                 | Rabbit                    |
| p-I $\kappa$ B $\alpha$  | 9246           | CST                 | Mouse                     |
| T-I $\kappa$ B $\alpha$  | 4814           | CST                 | Mouse                     |
| SHP1                     | Sc-287         | Santa cruz          | Rabbit                    |
| TRAF6                    | ab40675        | Abcam               | Rabbit                    |
| p-TAK1                   | ab192443       | Abcam               | Rabbit                    |
| T-TAK1                   | 5206           | CST                 | Rabbit                    |
| p-JNK1/2                 | 4668           | CST                 | Rabbit                    |
| T-JNK1/2                 | 9252           | CST                 | Rabbit                    |
| CD11b                    | ab75476        | Abcam               | Rabbit                    |
| F4/80                    | MCA497         | AbD Serotec         | Mouse                     |
| Myeloperoxidase          | ab45977        | Abcam               | Rabbit                    |
| HNF4                     | ab41898        | Abcam               | Mouse                     |
| Flag                     | 008            | MBL                 | Mouse                     |
| HA                       | 006            | MBL                 | Mouse                     |
| HA                       | C29F4          | CST                 | Rabbit                    |
| Myc                      | 074            | MBL                 | Mouse                     |
| $\beta$ -actin           | ab6276         | Abcam               | Mouse                     |
